# Supplementary material for: Effect of Methacrylic Acid Monomer on UV-Grafted Polyethersulfone Forward Osmosis Membrane
Source: MDPI journal article supplement (doi:10.3390/membranes13020232), 2023-02-15
Supplement: s1 [file s1]

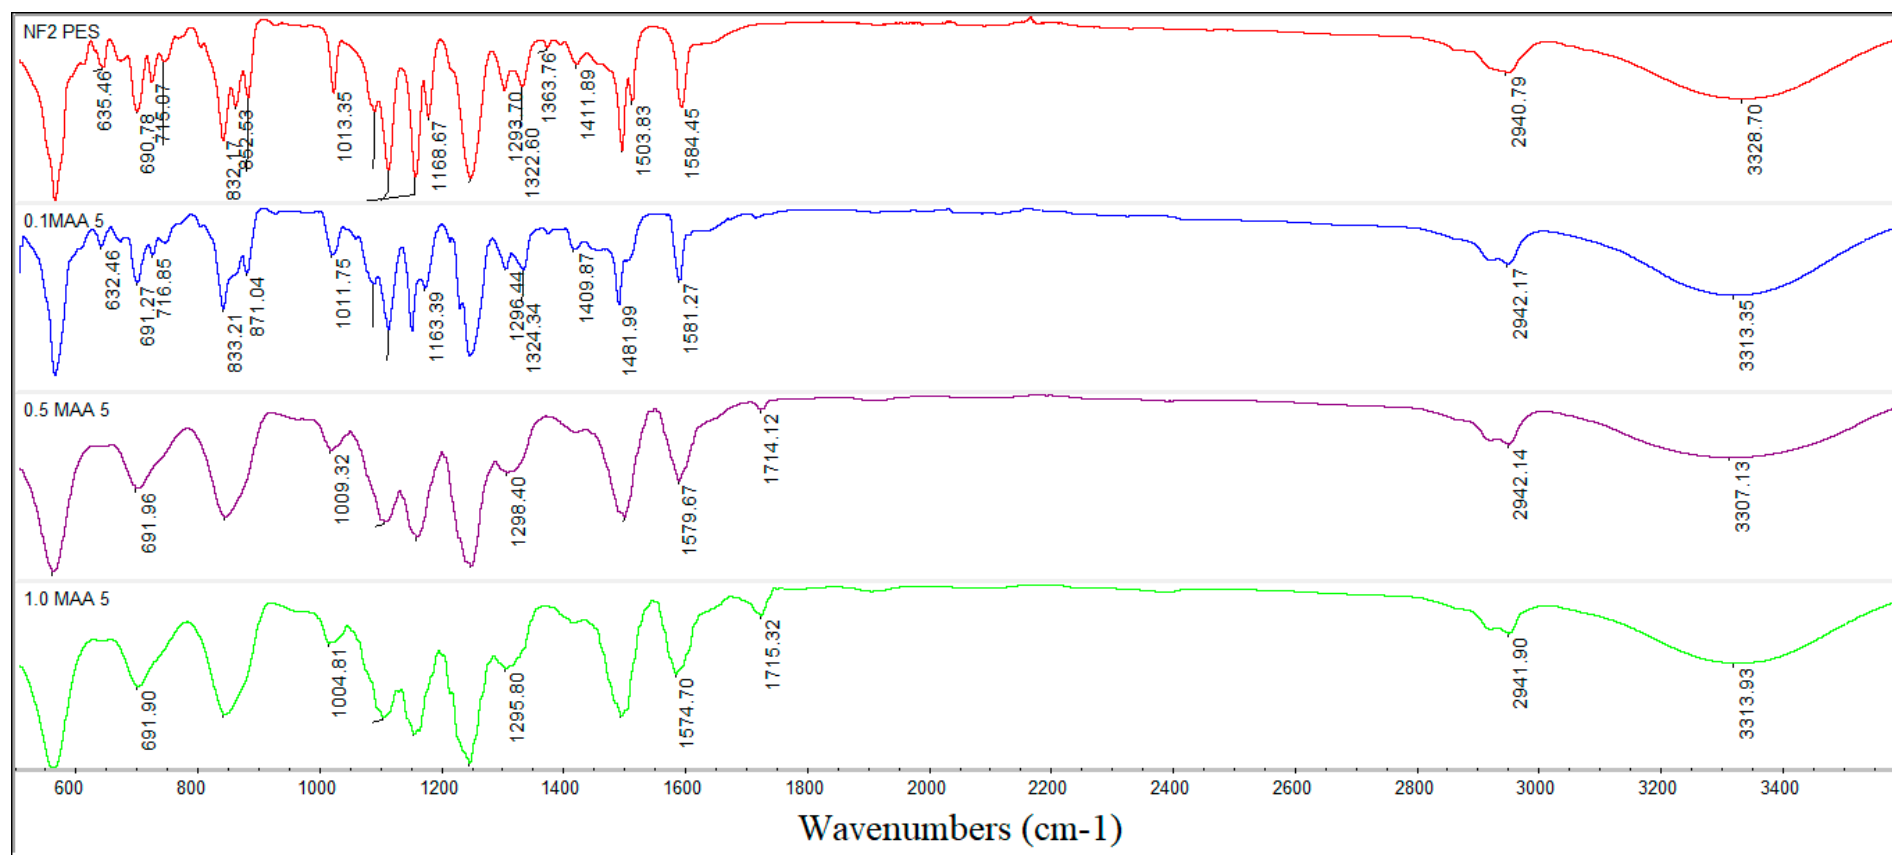

**Figure S1.** FTIR spectra and characteristic peaks for the unmodified NF2 PES and UV-grafted membranes 0.1MAA3, 0.5MAA3 and 1.0MAA3.

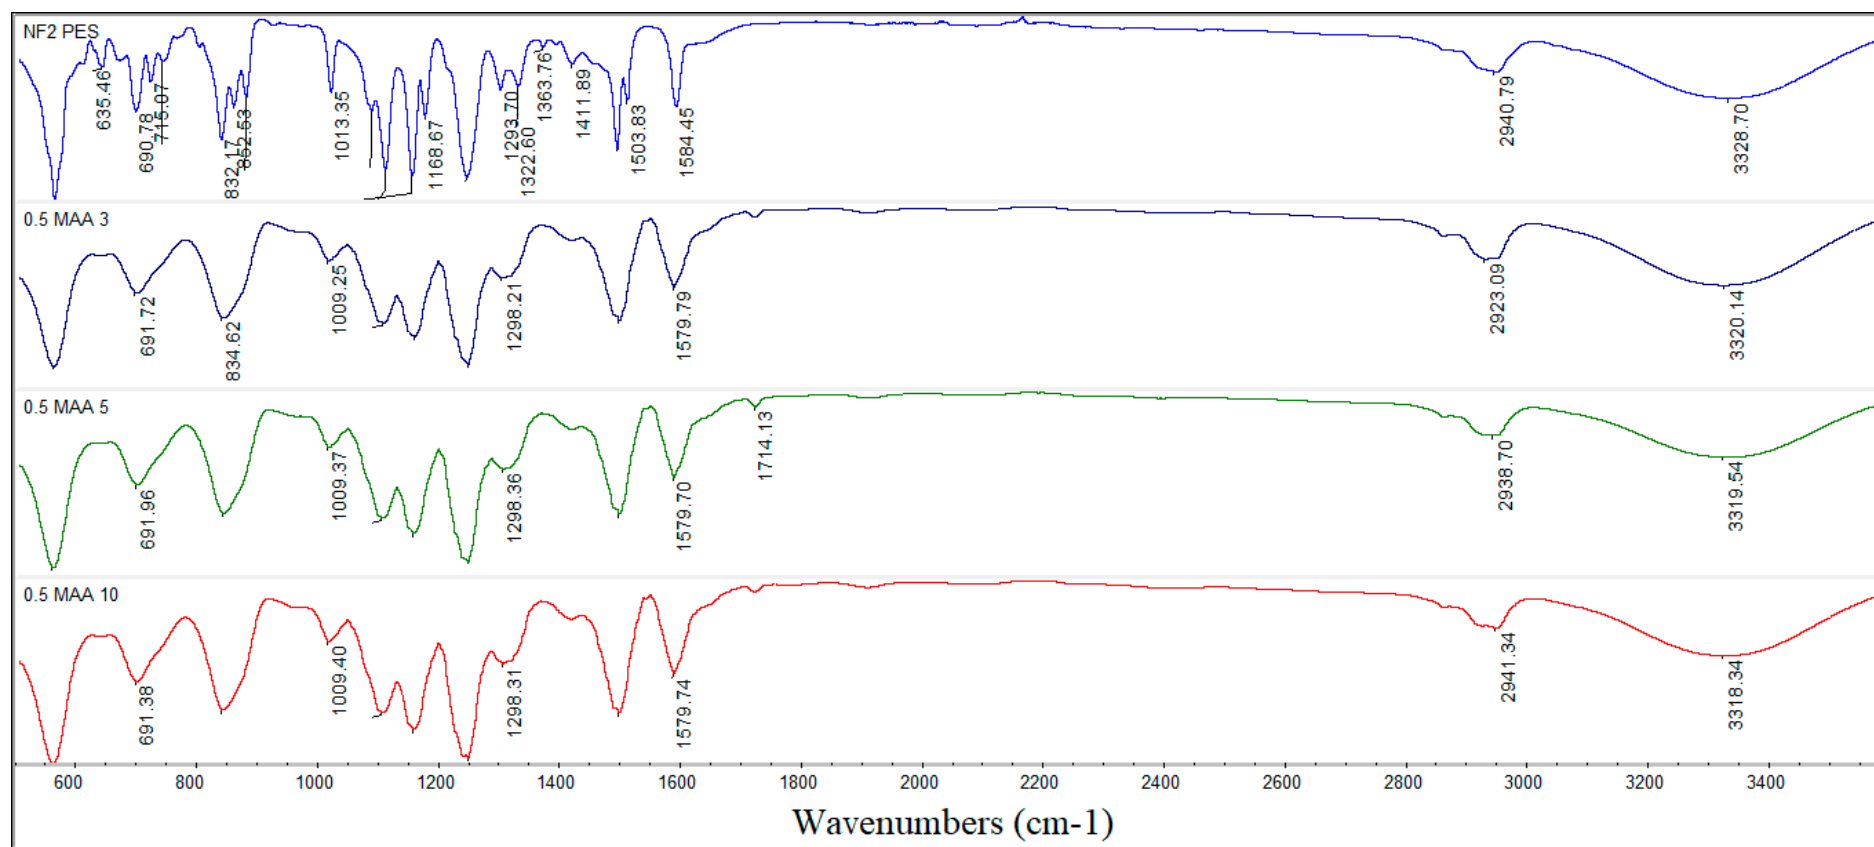

**Figure S2.** FTIR spectra and characteristic peaks for the unmodified NF2 PES and UV-grafted membranes 0.5MAA3, 0.5MAA5 and 0.5MAA10.
